# Supplementary material for: Bacterial Effector Binding to Ribosomal Protein S3 Subverts NF-κB Function
Source: PubMed Central journal article supplement (PMC2791202; doi:10.1371/journal.ppat.1000708), 2009-12-24

**A**

NleH1: 1 MLSPYSVNLGCSWNSLTRNLTSPDNRVLSSVRDAAVHSDNGAQVKVGNRTYRVVATDNKF  
 NleH2: 1 MLSPSSINLGCWNSLTRNLTSPDNRVLSSVRDAAVHSDSGTQVTVGNRTYRVVATDNKF  
 \*\*\*\*\* \* \*\*\*\*\* \* \*\*\*\*\* \* \*\*\*\*\* \* \*\*\*\*\* \* \*\*\*\*\*

61 CVTRESHSGCFTNLLHRLGWPKEISRKIEVMLNASPVSAAMERGIVHSNRDLPVDYA  
 61 CVTRESHSGCFTNLLHRLGWPKEISRKIEAMLNTPSPVSTTIERGSVHSNRDLPVDYA  
 \*\*\*\*\* \* \*\*\*\*\* \* \*\*\*\*\* \* \*\*\*\*\* \* \*\*\*\*\* \* \*\*\*\*\*

121 PPELPSVDY-----NRLSVPGNVIGKGNVYVEDAEDATKVLKMF TTSQSNEEV  
 121 QPELPPADY TQSELPRVSNKSPVPGNVIGKGNVYVEDMEDT TKVLKMF TISQSHEEV  
 \*\*\*\*\* \*\* \* \*\*\*\*\* \* \*\*\*\*\* \* \*\*\*\*\* \* \*\*\*\*\* \* \*\*\*\*\*

171 TSEVRCFNQYYGAGSAEKIYGNNGDIIGIRMDKINGESLLN ISSLPAQAEHAIYDMFDRL  
 181 TSEVRCFNQYYGSGSAEKIYNDNGNVIGIRMNKINGESLLDIPSLPAQAEQAIYDMFDRL  
 \*\*\*\*\* \* \*\*\*\*\* \* \*\*\*\*\* \* \*\*\*\*\* \* \*\*\*\*\* \* \*\*\*\*\*

231 EQKGILFVDTTETNVLYDRAKNEFNPIDISSYNVSDRSWSSESQIMQSYHGGKQDLISVVLSKI  
 241 EKKGILFVDTTETNVLYDRMRNEFNPIDISSYNVSDISWSEHQVMQSYHGGKLDLISVVLSKI  
 \* \*\*\*\*\* \* \*\*\*\*\* \* \*\*\*\*\* \* \*\*\*\*\* \* \*\*\*\*\* \* \*\*\*\*\*

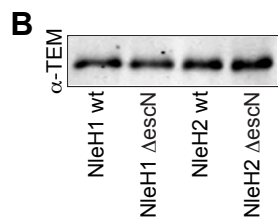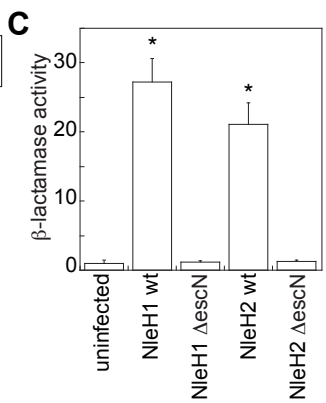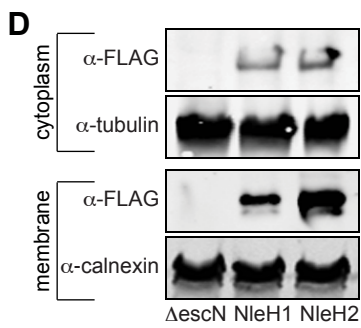

Supplement: ppat.1000708.s001.pdf [file ppat.1000708.s001.pdf]
