# Supplementary material for: Bacterial Effector Binding to Ribosomal Protein S3 Subverts NF-κB Function
Source: PubMed Central journal article supplement (PMC2791202; doi:10.1371/journal.ppat.1000708), 2009-12-24

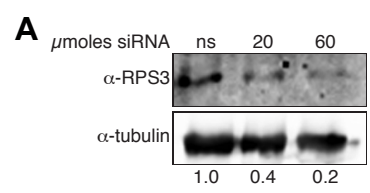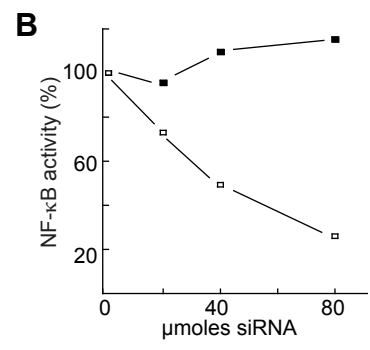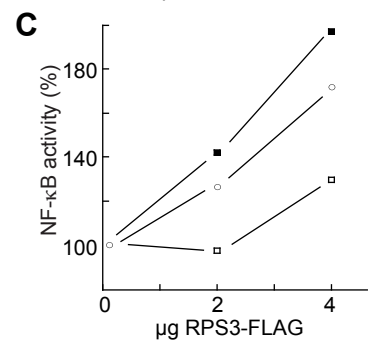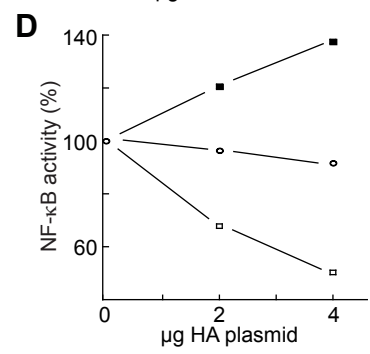

Supplement: ppat.1000708.s006.pdf [file ppat.1000708.s006.pdf]
