# Supplementary material for: Bacterial Effector Binding to Ribosomal Protein S3 Subverts NF-κB Function
Source: PubMed Central journal article supplement (PMC2791202; doi:10.1371/journal.ppat.1000708), 2009-12-24
Supplement: ppat.1000708.s007.pdf [file ppat.1000708.s007.pdf]

# A A A \*\*\* \*  
NleH1 EDL933 MLSPYSVNLGCSWNSLTRLNLTSPDNRVLSSVRDAAVHSDNGAQVKVGNRTYRVVATDNKFCVTRRESHSGCPTNLLHRLGWPKEISRKIEVMLNASPVSAAMERGI VHSNRPDLPPVDYAPPELPSVDY-----NRLSVPGN  
O157:NM-15842 MLSPYSVNLGCSWNSLTRLNLTSPDNRVLSSVRDAAVHSDNGAQVKVGNRTYRVVATDNKFCVTRRESHSGCPTNLLHRLGWPKEISRKIEVMLNASPVSAAMERGI VHSNRPDLPPVDYAPPELPSVDY-----NRLSVPGN  
O119:H25-EC92-267 MLSPYSVNLGCSWNSLTRLNLTSPDNRVLSSVRDAAVHSDNGAQVKVGNRTYRVVATDNKFCVTRRESHSGCPTNLLHRLGWPKEISRKIEVMLNASPVSAAMERGI VHSNRPDLPPVDYAPPELPSVDY-----NRLSVPGN  
NleH1 Sakai MLSPYSVNLGCSWNSLTRLNLTSPDNRVLSSVRDAAVHSDNGAQVKVGNRTYRVVATDNKFCVTRRESHSGCPTNLLHRLGWPKEISRKIEVMLNASPVSAAMERGI VHSNRPDLPPVDYAPPELPSVDY-----NRLSVPGN  
O157:H7-278F1 MLSPYSVNLGCSWNSLTRLNLTSPDNRVLSSVRDAAVHSDNGAQVKVGNRTYRVVATDNKFCVTRRESHSGCPTNLLHRLGWPKEISRKIEVMLNASPVSAAMERGI VHSNRPDLPPVDYAPPELPSVDY-----NRLSVPGN  
NleH2 EDL933 MLSPSSINLGCWNSLTRLNLTSPDNRVLSSVRDAAVHSDSGTQVTVGNRTYRVVATDNKFCVTRRESHSGCPTNLLHRLGWPKEISRKIEAMLNTSPVSTTIERGSVHSNRPDLPPVDYAPPELPPADYTQSELPRVSNKSPVPGN  
NleH2 Sakai MLSPSSINLGCWNSLTRLNLTSPDNRVLSSVRDAAVHSDSGTQVTVGNRTYRVVATDNKFCVTRRESHSGCPTNLLHRLGWPKEISRKIEAMLNTSPVSTTIERGSVHSNRPDLPPVDYAPPELPPADYTQSELPRVSNKSPVPGN  
C. rodentium MLSPAPVNLGCSWNSLTRLNLTSPDNRVLSSVRDAAACSDNGTQVKVGNRIYRVVATDNKFCVARENHSGCPTNMLHRLGWPKEITRKEAMLNTSPVNLAMERGSVHLKRPDLPPVDYMQPELPRVDY-----NKSPVPGN  
O111:H- MLSPSSVNLGCSWNSLTRLNLTSPDSRILSSVRDAAASSDNGAQVKVGNRTYRVVATDNKFCVTRRESHSGCPTNLLHRLGWPKEISRKIEVMLNSSPVNRAMERGAHVSNRPDLPPVDYAPPELPSVDY-----NSLPVPGN  
O26:H11 MLSPSSVNLGCSWNSLTRLNLTSPDSRILSSVRDAAASSDNGAQVKVGNRTYRVVATDNKFCVTRRESHSGCPTNLLHRLGWPKEISRKIEVMLNSSPVNRAMERGAHVSNRPDLPPVDYAPPELPSVDY-----NSLPVPGN  
O111:NM-R82F2 MLSPSSVNLGCSWNSLTRLNLTSPDSRILSSVRDAAASSDNGAQVKVGNRTYRVVATDNKFCVTRRESHSGCPTNLLHRLGWPKEISRKIEVMLNSSPVNRAMERGAHVSNRPDLPPVDYAPPELPSVDY-----NSLPVPGN  
O88:H25-EC94-453 MLSPSSVNLGCSWNSLTRLNLTSPDSRILSSVRDAAASSDNGAQVKVGNRTYRVVATDNKFCVTRRESHSGCPTNLLHRLGWPKEISRKIEVMLNSSPVNRAMERGAHVSNRPDLPPVDYAPPELPSVDY-----NSLPVPGN  
O69:H11-EC97-821 MLSPSSVNLGCSWNSLTRLNLTSPDSRILSSVRDAAASSDNGAQVKVGNRTYRVVATDNKFCVTRRESHSGCPTNLLHRLGWPKEISRKIEVMLNSSPVNRAMERGAHVSNRPDLPPVDYAPPELPSVDY-----NSLPVPGN  
11128 OspG -----MKIISTVIQTFFPFEN-----NNSHTGVVT-----EPILGK  
S. flexneri OspG -----MKITSTIIQTFFPFEN-----NNSHAGIVT-----EPILGK

NleH1 EDL933 VIGKGGNAVVEDAEADATKVLKMFTTQSQN----EVTSEVRCFNQYYGAGSAEKIYGNNGDII GIRMCKINGESLLNIS--SLPAQAEHAIYDMFDRLEQKGILFVDTTETNVLYDRAKNEFNPIDISSYVSDRSWSESQ---IMQSYHGGKQDLISVVLSKI--  
O157:NM-15842 VIGKGGNAVVEDAEADATKVLKMFTTQSQN----EVTSEVRCFNQYYGAGSAEKIYGNNGDII GIRMCKINGESLLNIS--SLPAQAEHAIYDMFDRLEQKGILFVDTTETNVLYDRAKNEFNPIDISSYVSDRSW-----  
O119:H25-EC92-267 VIGKGGNAVVEDAEADATKVLKMFTTQSQN----EVTSEVRCFNQYYGAGSAEKIYGNNGDII GIRMCKINGESLLNIS--SLPAQAEHAIYDMFDRLEQKGILFVDTTETNVLYDRAKNEFNPIDISSYVSDRSWSESQ---IMQSYHGGKQDLISVVLSKI--  
NleH1 Sakai VIGKGGNAVVEDAEADATKVLKMFTTQSQN----EVTSEVRCFNQYYGAGSAEKIYGNNGDII GIRMCKINGESLLNIS--SLPAQAEHAIYDMFDRLEQKGILFVDTTETNVLYDRAKNEFNPIDISSYVSDRSWSESQ---IMQSYHGGKQDLISVVLSKI--  
O157:H7-278F1 VIGKGGNAVVEDAEADATKVLKMFTTQSQN----EVTSEVRCFNQYYGAGSAEKIYGNNGDII GIRMCKINGESLLNIS--SLPAQAEHAIYDMFDRLEQKGILFVDTTETNVLYDRAKNEFNPIDISSYVSDRSWSESQ---IMQSYHGGKQDLISVVLSKI--  
NleH2 EDL933 VIGKGGNAVVEDMEDTTKVLKMFTTISQSH----EVTSEVRCFNQYYGAGSAEKIYNDNGNVI GIRMCKINGESLLDIP--SLPAQAEHAIYDMFDRLEQKGILFVDTTETNVLYDRMRNEFNPIDISSYVSDISWSEHQ---VMQSYHGGKQDLISVVLSKI--  
NleH2 Sakai VIGKGGNAVVEDMEDTTKVLKMFTTISQSH----EVTSEVRCFNQYYGAGSAEKIYNDNGNVI GIRMCKINGESLLDIP--SLPAQAEHAIYDMFDRLEQKGILFVDTTETNVLYDRMRNEFNPIDISSYVSDISWSEHQ---VMQSYHGGKQDLISVVLSKI--  
C. rodentium VIGKGGNAVVEDMDDTTKVLKMFTTSQNP----EVTNEVRCFNQYYGAGSAEKIYDANGDII GIRMCKINGESLFIQ--SLPTQAEHAIYDMFDRLEQKRIKFVDTTETNVLYDRVRNEFNPIDISSYVSDVSWREGQ---IMQSYHGGKQDLIRVVLISRI--  
O111:H- VIGKGGNAVVEDAEADATKVLKMFTTQSQN----EVTNEVRCFNQYYGAGSAEKIYDNGDII GIRMCKINGESLLNIS--SLPAQAEHAIYDMFDRLEQKGILFIDTTETNVLYDRTRNEFNPIDISSYVSDISWSEHQ---IMQSYHGGKQDLISVVLSKI--  
O26:H11 VIGKGGNAVVEDAEADATKVLKMFTTQSQN----EVTNEVRCFNQYYGAGSAEKIYDNGDII GIRMCKINGESLLNIS--SLPAQAEHAIYDMFDRLEQKGILFIDTTETNVLYDRTRNEFNPIDISSYVSDISWSEHQ---IMQSYHGGKQDLISVVLSKI--  
O111:NM-R82F2 VIGKGGNAVVEDAEADATKVLKMFTTQSQN----EVTNEVRCFNQYYGAGSAEKIYDNGDII GIRMCKINGESLLNIS--SLPAQAEHAIYDMFDRLEQKGILFIDTTETNVLYDRTRNEFNPIDISSYVSDISWSEHQ---IMQSYHGGKQDLISVVLSKI--  
O88:H25-EC94-453 VIGKGGNAVVEDAEADATKVLKMFTTQSQN----EVTNEVRCFNQYYGAGSAEKIYDNGDII GIRMCKINGESLLNIS--SLPAQAEHAIYDMFDRLEQKGILFIDTTETNVLYDRTRNEFNPIDISSYVSDISWSEHQ---IMQSYH-----  
O69:H11-EC97-821 VIGKGGNAVVEDAEADATKVLKMFTTQSQN----EVTNEVRCFNQYYGAGSAEKIYDNGDII GIRMCKINGESLLNIS--SLPAQAEHAIYDMFDRLEQKGILFIDTTETNVLYDRTRNEFNPIDISSYVSDISWSEHQ---IMQSYHGGKQDLISV-----  
11128 OspG LIQGGSSTAEIFEDMNDSSALYKYYDLVGNQHNEVLEMARQESALFNFTFYG-DDASVVIQYGGDVI-LRMLRVPGTPLSDIDTADIPDNLESYLYQLICKLNELSIHYDLNTGNMLYDKESNSLFPIDFRNIYSEYYSATKNDKEIIDRRLQMRNTDFYSLNKRKYL  
S. flexneri OspG LIQGGSSTAEIFEDVNDSSALYKYYDLVGNQHNEVLEMARQESALFNFTFYG-DEASVVIQYGGDVI-LRMLRVPGTPLSDIDTADIPDNLESYLYQLICKLNELSIHYDLNTGNMLYDKESNSLFPIDFRNIYAEYAAATKKDKKEIIDRRLQMRNTDFYSLNKRKYL
